# Supplementary material for: Pickering emulsion-fabricated polystyrene–graphene oxide microspheres and their electrorheology
Source: Royal Society of Chemistry journal article supplement (doi:10.1039/c4tc01040j), 2014-07-15
Supplement: c4tc01040j1.pdf [file c4tc01040j1.pdf]

Electronic supplementary information

# Pickering emulsion-fabricated smart microspheres of polystyrene/graphene oxide and their electrorheology

*Sang Deuk Kim, Wen Ling Zhang, Hyoung Jin Choi\**

Department of Polymer Science and Engineering, Inha University, Incheon, 402-751, Korea

Corresponding author: E-mail: [hjchoi@inha.ac.kr](mailto:hjchoi@inha.ac.kr)

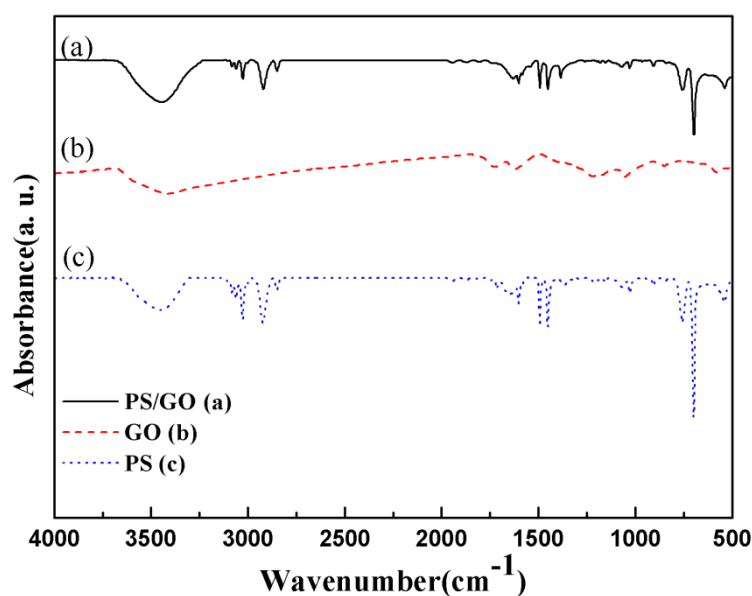

**Figure S1** FT-IR spectra of PS/GO microsphere (a), bare GO (b) and pure PS (c).

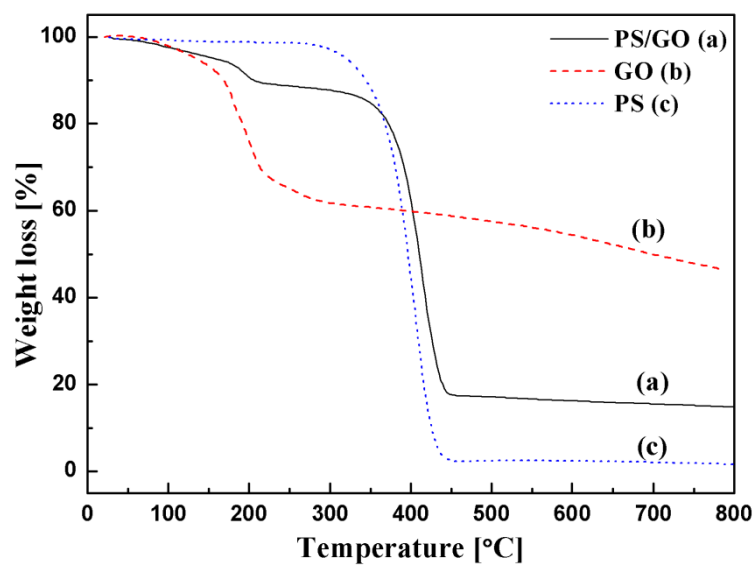

**Figure S2** TGA curves of PS/GO microspheres (a), GO (b) and pure PS (c).

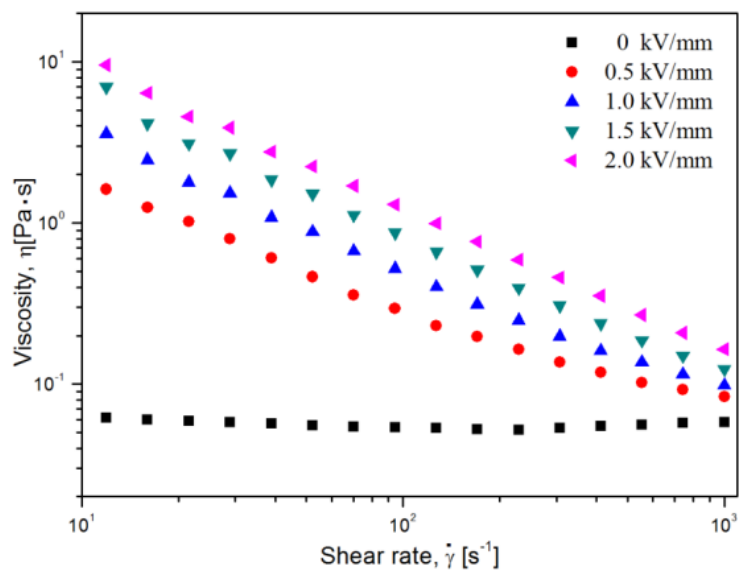

**Figure S3** Shear viscosity curves vs. shear rate for PS/GO microspheres based ER fluid (10vol% particle concentration).

**Table S1** Fitting parameters of Bingham, CCJ model, SCS model equations to the flow curves of PS/GO microsphere-based ER fluid

| Model   | Parameters    | Electric field strength/kV mm <sup>-1</sup> |       |        |       |
|---------|---------------|---------------------------------------------|-------|--------|-------|
|         |               | 0.5                                         | 1.0   | 1.5    | 2.0   |
| Bingham | $\tau_0$      | 19.3                                        | 42.7  | 83.7   | 114   |
|         | $\eta$        | 0.083                                       | 0.099 | 0.124  | 0.165 |
| CCJ     | $\tau_0$      | 19.3                                        | 42.7  | 83.7   | 114   |
|         | $t_1$         | 0.002                                       | 0.001 | 0.0008 | 0.001 |
|         | $\alpha$      | 0.2                                         | 0.35  | 0.5    | 0.85  |
|         | $\eta_\infty$ | 0.083                                       | 0.099 | 0.124  | 0.165 |
|         | $t_2$         | 0.011                                       | 0.012 | 0.5    | 0.7   |
|         | $\beta$       | 0.95                                        | 0.95  | 0.95   | 0.95  |
| SCS     | $\tau_0$      | 25                                          | 49    | 102    | 172   |
|         | $\eta$        | 0.065                                       | 0.06  | 0.04   | 0.041 |
|         | a             | 0.72                                        | 0.5   | 0.49   | 0.37  |
|         | $\alpha$      | 0.5                                         | 0.6   | 0.3    | 0.2   |
